# Supplementary material
Source: Research Square preprint supplement (doi:10.21203/rs.3.rs-9777010/v1)
Supplement: Supplementary file 1 [file 9d4b91039ed03606cb925e36.docx]

**Tanzanian** **service providers' experiences delivering services to survivors of violence against women and girls**

**Interview guide for services providers**

Introductory Script: Good morning/afternoon/evening

Thank you so much for participating in this interview. Before we begin, I would like to give you some background on the rationale for this research. The objective of this interview is to explore the service providers' experiences, the facilitators and barriers, and the strategies to address them while providing services to the survivors of violence against women and girls(VAWG). The information is essential for strengthening survivors-centred prevention and response services and improving the effectiveness of VAWG multisectoral service response systems in Tanzania.

Before we begin, I want to remind you that participation in this interview is voluntary, and anything you say will be kept confidential. With your authorization, responses will be audio-recorded and shared only as part of a summary report, with no names or other identifying information. You can stop the interview at any point or pass on questions you would prefer not to answer. Before we get started, do you have any questions for me?

1. How are you today?
2. Let's begin by talking about VAWG.

- Probe for what it is about, what causes/contributing factors, its consequences (health, social and economic), and what the community's perception is if it is a problem?
- Probe for types/forms of physical, psychological, sexual, economic, cyber / technology-driven violence
- Probe for types /forms commonest reported in your facility
- Probe for any community views/opinions toward women and girls experiencing VAWG?

3. Tell me about services offered to victims/survivors of VAWG

- Probe for screening/ assessing for VAWG, providing physical medical care, psychological/counseling services / social services, medical-legal, legal and police services, assisting with a safety plan and referral to other services
- Encourage/probe to add more if there are any other services or information

4. Personally, have you offered these services to victims/ survivors of VAWG

- Describe your answer
- Probe for any barriers/ challengies in handling/ providing services to survivors/ victims of VAWG
- Probe for safety to survivors and providers
- Probe for follow-up care
- Can you tell how you overcome those barriers/challenges?
- Can you tell more
- Are there any facilitators in handling/ providing services to survivors/ victims of VAWG
- What are they
- Can you tell more

5. Have you heard of training on the service providers' management of VAWG?

- How /where did you hear?
- Have you /colleagues attended /received training on responding to and preventing VAWG?
- What is the training about

6. Would it be possible to prevent VAWG in a community?

- Why or why not?
- Describe your reasoning
- What are the possible facilitators?
- Describe your answer
- How can they enhance
- What are the barriers?
- Describe your answer
- How can they be overcome?

7. What, if any, do you want to share about VAWG?

**Closing Script**: We have reached the end of the interview. Thank you for your participation. Don't hesitate to get in touch with us if you have further questions or comments about what we discussed today. Or you can also call the numbers listed on your consent form.
